# Supplementary material for: Ethyl Acetate Fraction of Bixa orellana and Its Component Ellagic Acid Exert Antibacterial and Anti-Inflammatory Properties against Mycobacterium abscessus subsp. massiliense
Source: MDPI journal article supplement (doi:10.3390/antibiotics11060817), 2022-06-17
Supplement: s1 [file s1]

## Supplementary Material

### Ethyl Acetate Fraction of *Bixa orellana* and Its Component Ellagic Acid Exert Antibacterial and Anti-inflammatory properties against *Mycobacterium abscessus* subsp. *massiliense*

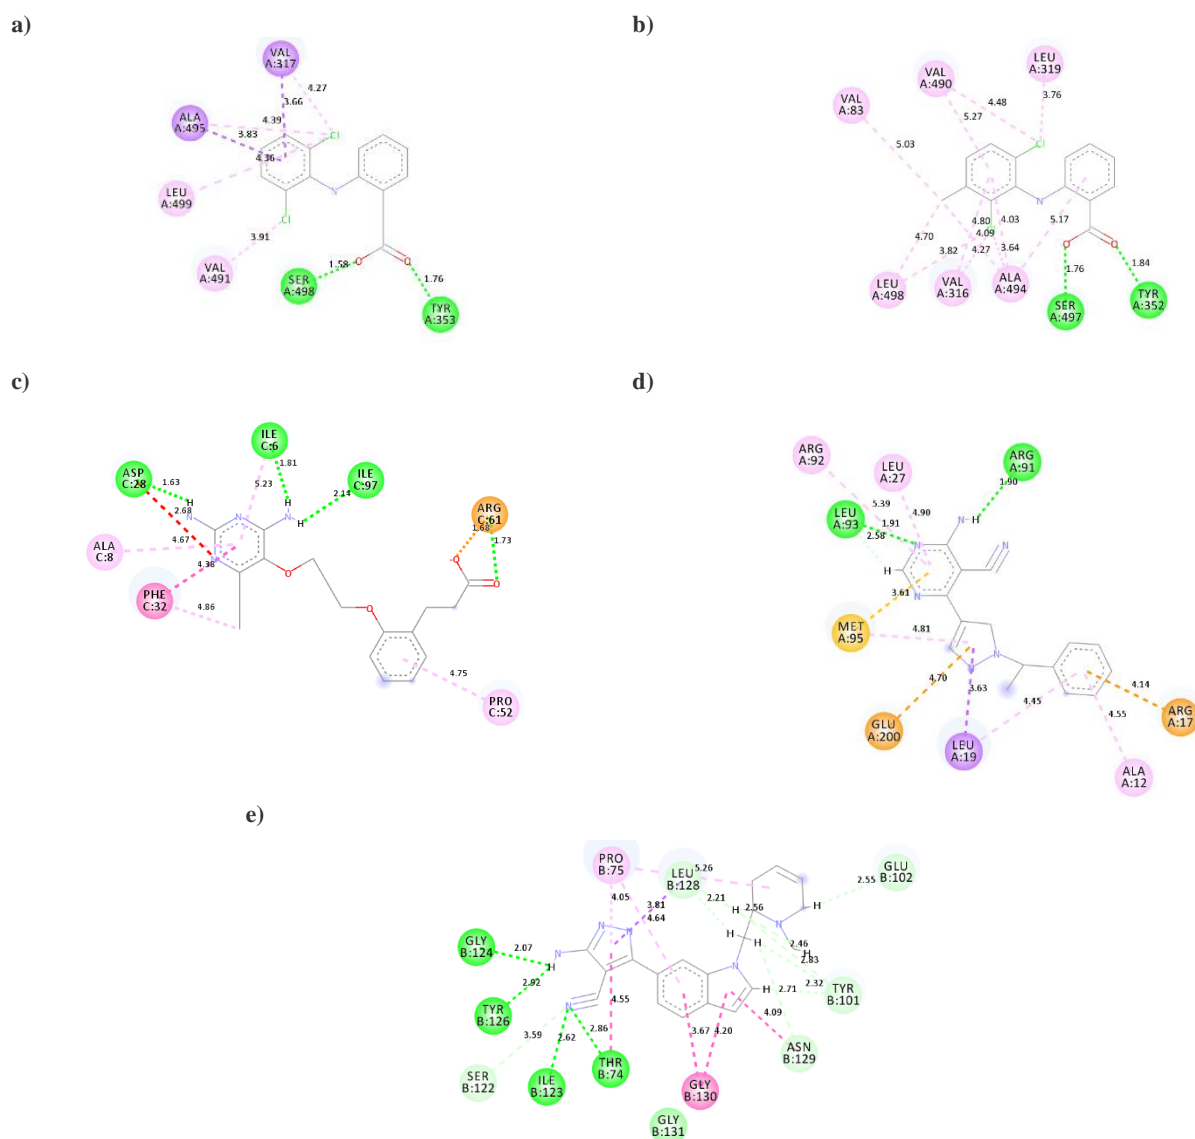

**Figure S1:** Diagram 2D of Interactions between controls / native ligands and targets: a) diclofenac and COX2 (PDB ID: 1PXX); b) meclofenamic acid and COX2 (PDB ID: 5IKQ); c) MMV ligand and dihydrofolate reductase (PDB ID: 7K6C); d) Q0Q ligand and phosphoribosylaminoimidazole-succinocarboxamide synthase (PDB ID: 6YYB), and e) JD8 ligand and tRNA (guanine-N(1))-methyltransferase (PDB ID: 6QR4). Interactions: Conventional Hydrogen Bond: ■, Pi-Sigma: ■, Alkyl/ Pi-Alkyl: ■, Van der Waals: ■, Salt Bridge: ■ (present in c), Pi-Pi stacked: ■ (present in c), Unfavorable Acceptor-Acceptor: ■, Pi-cation: ■ (present in d), Carbon Hydrogen Bond: ■.

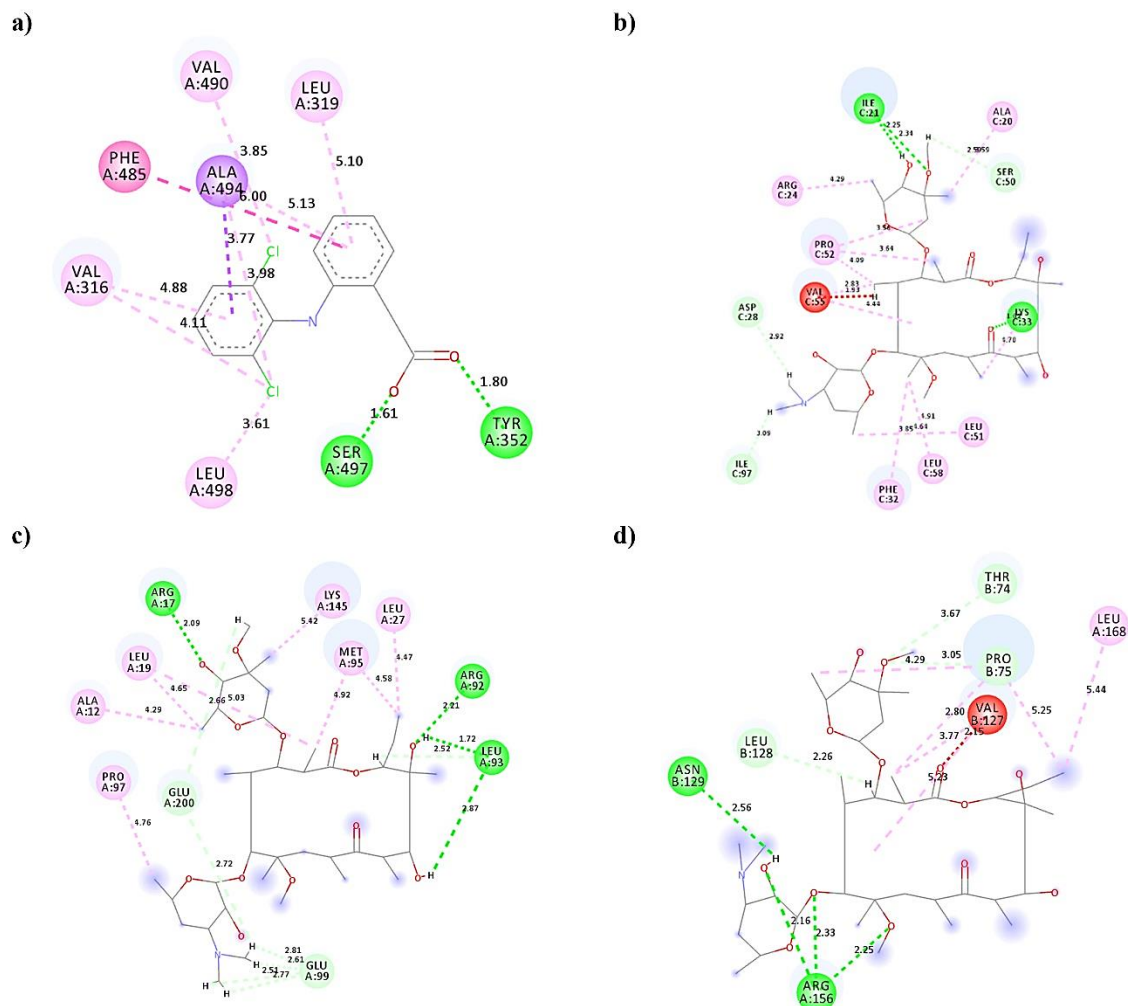

**Figure S2:** Diagram 2D of Interactions between controls and targets. a) Interactions between diclofenac and COX2 (PDB ID: 5IKQ); b) Interactions between claritromycin and Dihydrofolate reductase (PDB ID 7K6C); c) Interactions between claritromycin and Phosphoribosylaminoimidazole-succinocarboxamide synthase (PDB ID 6YYB); d) Interactions between clarithromycin and tRNA (guanine-N(1)-)-methyltransferase (PDB ID 6QR4).

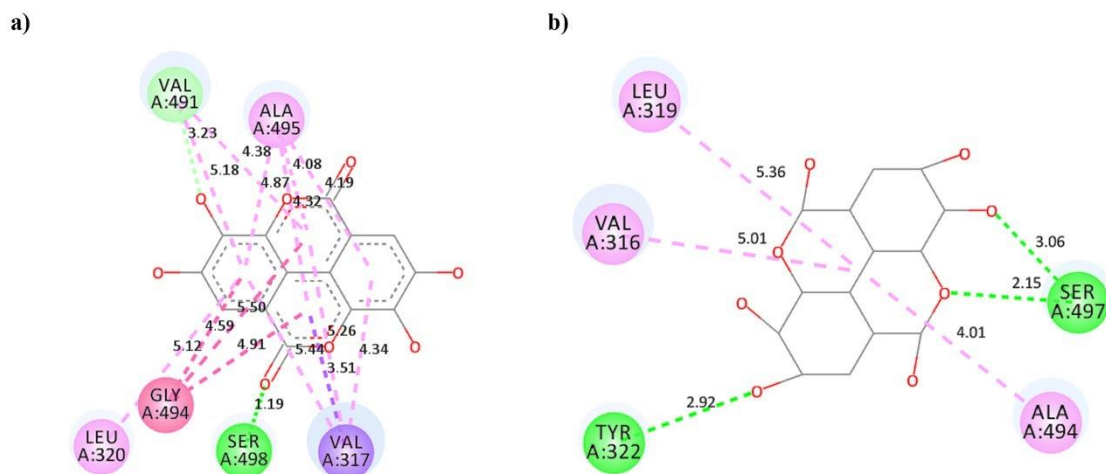

**Figure S3:** Diagram 2D of Interactions between ellagic acid and COX2 targets: (a) with the murine COX2 (PDB ID: 1PXX) and (b) with the human COX2 (PDB ID: 5IKQ). Interactions: ■ - Conventional Hydrogen Bond, ■ - Pi-Sigma, ■ - Alkyl/ Pi-Alkyl, ■ - Carbon Hydrogen Bond, ■ - Amide Pi-Stacked

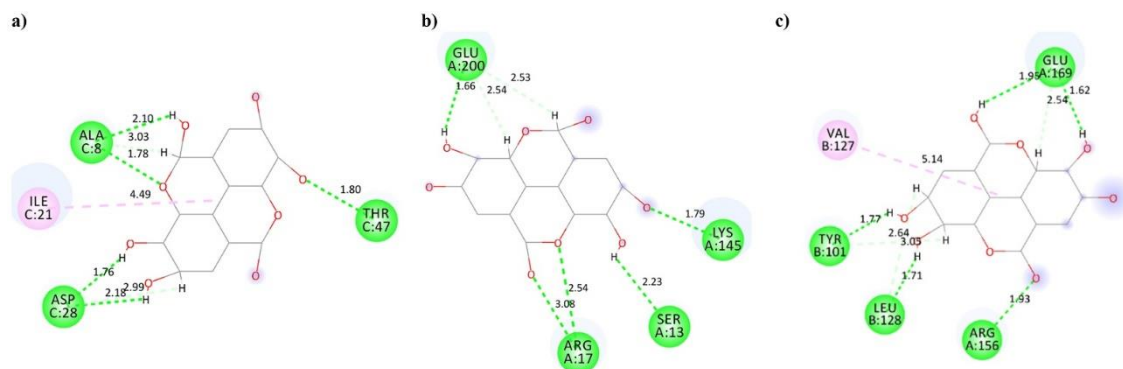

**Figure S4:** Diagram 2D of Interactions between ellagic acid and targets for antimicrobial activity: a) Dihydrofolate reductase (PDB ID 7K6C); b) Phosphoribosylaminoimidazole-succinocarboxamide synthase (PDB ID 6YYB), and c) tRNA (guanine-N(1)-)-methyltransferase (PDB ID 6QR4). Interactions: ■ - Conventional Hydrogen Bond, ■ - Alkyl, ■ - Carbon Hydrogen Bond.

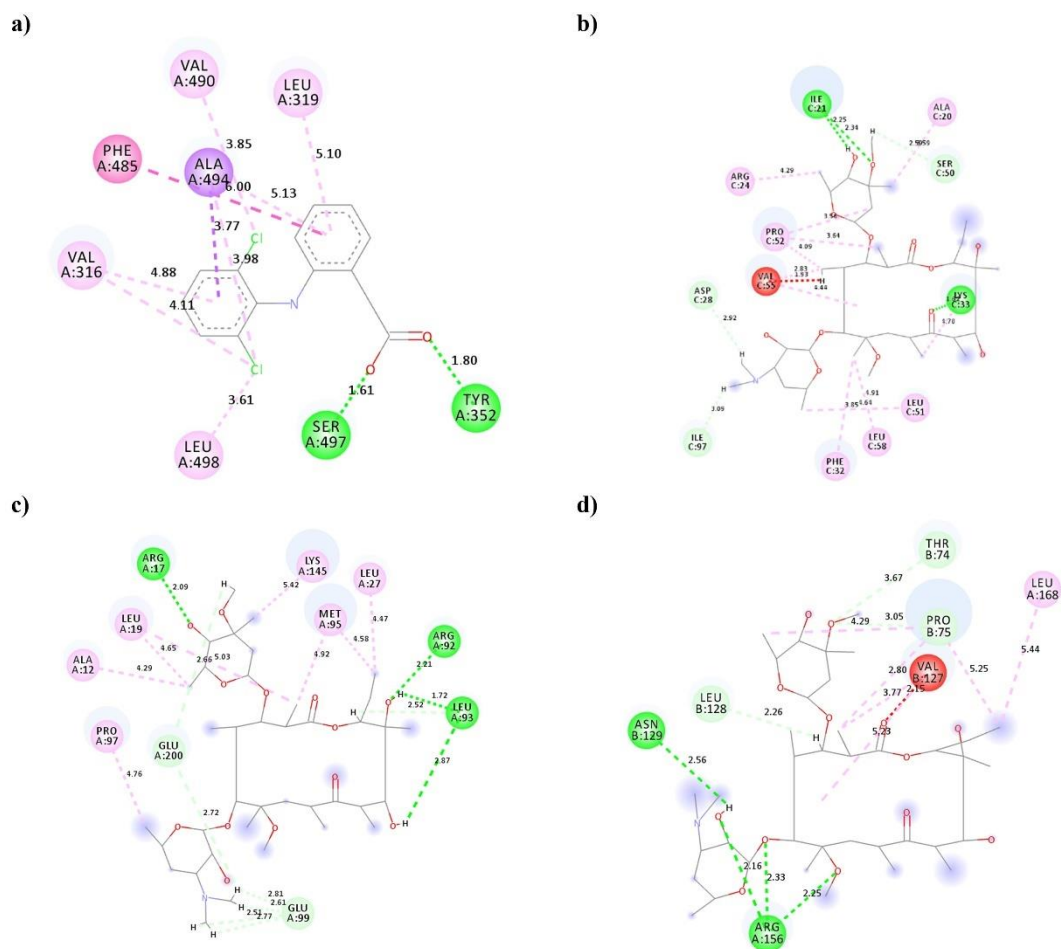

**Figure S5:** Diagram 2D of Interactions between: a) diclofenac and COX2 (PDB ID: 5IKQ); b) clarithromycin and Dihydrofolate reductase (PDB ID 7K6C); c) clarithromycin and Phosphoribosylaminoimidazole-succinocarboxamide synthase (PDB ID 6YYB), and d) clarithromycin and tRNA (guanine-N(1))-methyltransferase (PDB ID 6QR4).

**Table S1:** Predicting molecular properties related to Lipinski's rule

| Compound       | Oral                                         |                   |                       |                     |                      |
|----------------|----------------------------------------------|-------------------|-----------------------|---------------------|----------------------|
|                | Bioavailability<br>( $< 140 \text{ \AA}^2$ ) | MW<br>( $< 500$ ) | ALogP<br>( $\leq 5$ ) | HBD<br>( $\leq 5$ ) | HBA<br>( $\leq 10$ ) |
| Clarithromycin | 183.726                                      | 747.477           | 2.200                 | 4                   | 14                   |
| Diclofenac     | 50.926                                       | 269.149           | 4.373                 | 2                   | 3                    |
| Ellagic Acid   | 135.723                                      | 302.193           | 1.584                 | 4                   | 8                    |

AlogP = the logarithm of the partition coefficient between n-octanol and water; MW: Molecular Weight; HBD: Hydrogen Bond Donnor; HBA: Hydrogen Bond Acceptor.
